# Supplementary material
Source: publisher figshare collection journal article supplement (https://plos.figshare.com/articles/dataset/_/5481889)
Supplement: Supplementary file [file 1]

S1 Table: Identified CR3 mRNA and gRNA transcripts

| A. CR3 Form A                                                                                                                                                                                          |                                                                | mRNA Sequence | Reads         |
|--------------------------------------------------------------------------------------------------------------------------------------------------------------------------------------------------------|----------------------------------------------------------------|---------------|---------------|
| AUGUGUAUGAUUAUAUA <u>uuAAuuAuuuuCAuuuuuAu</u> GuuuGA****UUGuuuGGuuuuGuuGuuuuUUUAuuGuuuGuuuGuA                                                                                                          |                                                                |               | 2114          |
| AUGUGUAUGAUUAUAUA--AA <u>uuAuuuuCAuuuuuAu</u> GuuuGA****UUGuuuGGuuuuGuuGuuuuUUUAuuGuuuGuuuGuA                                                                                                          |                                                                |               | 1217          |
| AUGUGUAUGAUUAUAUA--AA-- <u>AuuuuCAuuuuAu</u> GuuuGA****UUGuuuGGuuuuGuuGuuuuUUUAuuGuuuGuuuGuA                                                                                                           |                                                                |               | 480           |
| Fully Edited Form                                                                                                                                                                                      |                                                                |               | Reading Frame |
| M C M I Y N ST                                                                                                                                                                                         | M F D C L V L L F F Y C L F V                                  |               |               |
| AUGUGUAUGAUUAUAUA <u>uuAAuuAuuuuCAuuuuuAu</u> GuuuGA****UUGuuuGGuuuuGuuGuuuuUUUAuuGuuuGuuuGuA<br>     :::     :     :           :     <br><u>UUAAUUAGUGAAAGUGAGAUUAGACU</u> ----AACGAGCCAAACAAACUGUAUA |                                                                |               | ORF           |
| Cell Line                                                                                                                                                                                              | gRNA Sequence                                                  |               | Reads         |
| EATRO 164 PC                                                                                                                                                                                           | ATATGTACAACAAAACCGAGCAATCAGATATAGAGTGAAAGTGATTAAT <sub>N</sub> |               | 21297         |
| TREU 927 PC                                                                                                                                                                                            | ATATAACAACAAAACCTGAACAATCAAATGTAGAGTGAAAGTGATTAAT <sub>N</sub> |               | 3398          |
| TREU 667 PC                                                                                                                                                                                            | ATATAACAACAAAACCTGAACAATCAAATGTAGAGTGAAAGTGATTAAT <sub>N</sub> |               | 452           |

| B. CR3 Form B                                                                                                                                                                                                                                                                                       |                                                                  | mRNA Sequence | Reads         |
|-----------------------------------------------------------------------------------------------------------------------------------------------------------------------------------------------------------------------------------------------------------------------------------------------------|------------------------------------------------------------------|---------------|---------------|
| AUGUGUAUGAUUAUA <u>AuuAuuAuuuAuuu</u> CA <u>uuAu</u> GuuuGA****UUGuuuGGuuuuGuuGuuuuUUUAuuGuuuGuuuG                                                                                                                                                                                                  |                                                                  |               | 413           |
| AUGUGUAUGAUUAUA--A <u>uuAuuuAuuuAuuu</u> CA <u>uuAu</u> GuuuGA****UUGuuuGGuuuuGuuGuuuuUUUAuuGuuuGuuuG                                                                                                                                                                                               |                                                                  |               | 460           |
| Fully Edited Form                                                                                                                                                                                                                                                                                   |                                                                  |               | Reading Frame |
| <div>M C M I Y I I I Y L F S L C L I V W F C C F F I V C L</div> <div>AUGUGUAUGAUUAUA<u>AuuAuuAuuuAuuu</u>CA<u>uuAu</u>GuuuGA****UUGuuuGGuuuuGuuGuuuuUUUAuuGuuuGuuuG</div> <div>   ::   ::   ::   ::   ::   ::   ::   ::   </div> <div>uUAUGAUAGUAAGUGAGUGGAGGUAAUAUAGGCU----AACAAACCAAUAUAUA</div> |                                                                  |               | ARF +1        |
| Cell Line                                                                                                                                                                                                                                                                                           | gRNA Sequence                                                    |               | Reads         |
| EATRO 164 PC                                                                                                                                                                                                                                                                                        | ATATATAACCAAACAATCGGATATAATGGAGGTGAGTGAATGATAGTAT <sub>N</sub>   |               | 5             |
| TREU 927 PC                                                                                                                                                                                                                                                                                         | ATATATAACCAAACAATCGGATATAATGGAGGTGAGTGAATGATAGTAT <sub>N</sub>   |               | 14164         |
| TREU 927 PC                                                                                                                                                                                                                                                                                         | ATATATAACCAAACAATCGGATATAATGGAGGTGAGTGAATGATAGTATAT <sub>N</sub> |               | 642           |
| TREU 927 PC                                                                                                                                                                                                                                                                                         | ATATATAACCAAACAATCGGATATAATGGAGGTGAGTAAATGATAGTAT <sub>N</sub>   |               | 114           |
| TREU 667 PC                                                                                                                                                                                                                                                                                         | ATATATAACCAAACAATCGGATATAATGGAGGTGAGTGAATGATAGTAT <sub>N</sub>   |               | 1936          |
| TREU 667 PC                                                                                                                                                                                                                                                                                         | TATATAACCAAACAATCGGATATAATGGAGGTGAGTGAATGATAGTATAT <sub>N</sub>  |               | 236           |

| C. CR3 Form C                                                                                                                                                                                                                                                          | mRNA Sequence                                                   | Reads                |
|------------------------------------------------------------------------------------------------------------------------------------------------------------------------------------------------------------------------------------------------------------------------|-----------------------------------------------------------------|----------------------|
| AUGUGUAUGAUUAUAAAAACA-- <u>AuG</u> G <u>uA</u> ****UGuuGuuGuuuuuGuuuuG***AuuuuGGuuGuACAuuuuuuuuG                                                                                                                                                                       |                                                                 | 7147                 |
| AUGUGUAUGAUUAUAAAAACA-- <u>A-G</u> <u>uA</u> ****UGuuGuuGuuuuuGuuuuG***AuuuuGGuuGuACAuuuuuuuuG                                                                                                                                                                         |                                                                 | 889                  |
| AUGUGUAUGAUUAUAAAAACA <u>ua-A</u> -G <u>uA</u> ****UGuuGuuGuuuuuGuuuuG***AuuuuGGuuGuACAuuuuuuuuG                                                                                                                                                                       |                                                                 | 565*                 |
| AUGUGUAUGAUUAUAAAAACA- <u>uAuG</u> <u>uA</u> ****UGuuGuuGuuuuuGuuuuG***AuuuuGGuuGuACAuuuuuuuuG                                                                                                                                                                         |                                                                 | 505                  |
| <b>Fully Edited Form</b>                                                                                                                                                                                                                                               |                                                                 | <b>Reading Frame</b> |
| M C M I Y K N N V Y V V V L F W F W L Y I F F V<br>AUGUGUAUGAUUAUAAAAACA <u>AuG</u> <u>uA</u> ****UGuuGuuGuuuuuGuuuuG***AuuuuGGuuGuACAuuuuuuuuG<br>   :     : :: : : : : : :  : : : : : # : : :<br><sub>N</sub> UUAUAUAU-----AUAGUGUAAGAUGGAU---UGAAGCCGCACGUAUUAAUAUA |                                                                 | ARF +1               |
| Cell Line                                                                                                                                                                                                                                                              | gRNA Sequence                                                   | Reads                |
| EATRO 164 PC                                                                                                                                                                                                                                                           | ATAATAAAAATGCACAAC TAGAATTGAAGTAAAGTGATGATATATAT <sub>N</sub>   | 122                  |
| EATRO 164 PC                                                                                                                                                                                                                                                           | AAAATGCACAAC TAGAATTGAAGTAAAGTGATGATATATATAT <sub>N</sub>       | 3                    |
| EATRO 164 PC                                                                                                                                                                                                                                                           | ATATATAAAATGTACAACCAGAATTAAGATAAAGTGATGATGTATATAT <sub>N</sub>  | 1                    |
| EATRO 164 BS                                                                                                                                                                                                                                                           | ATAATAAAAATGCACAAC TAGAATTGAAGTAAAGTGATGATATATAT <sub>N</sub>   | 453                  |
| EATRO 164 BS                                                                                                                                                                                                                                                           | ATATTAAAAATGCACAAC TAGAATTGAAATAAAGTGATGGTATATAT <sub>N</sub>   | 224                  |
| EATRO 164 BS                                                                                                                                                                                                                                                           | ATAATAAAAATGCACAAC TAGAATTGAAGTAAAGTGATGATATATATAT <sub>N</sub> | 2                    |
| TREU 927 PC                                                                                                                                                                                                                                                            | ATAATAAAAATGCACAAC TAGAATTGAAATAAAGTGATGGTATATAT <sub>N</sub>   | 166                  |
| TREU 927 PC                                                                                                                                                                                                                                                            | ATATAATTAAATGCACAGCCGAAGTTAAGGTAGAATAGTGATATATATAT <sub>N</sub> | 117                  |
| TREU 927 PC                                                                                                                                                                                                                                                            | ATATATAAAATGTACAACCAGAATTAAGATAAAGTGATGATGTATATAT <sub>N</sub>  | 86                   |
| TREU 667 PC                                                                                                                                                                                                                                                            | ATAATAAAAATGCACAAC TAGAATTGAAATAAAGTGATGGTATATAT <sub>N</sub>   | 53                   |
| TREU 667 PC                                                                                                                                                                                                                                                            | ATATAATTAAATGCACAGCCGAAGTTAAGGTAGAATAGTGATATATAT <sub>N</sub>   | 15                   |
| TREU 667 PC                                                                                                                                                                                                                                                            | ATATATAAAATGTACAACCAGAATTAAGATAAAGTGATGATGTATATAT <sub>N</sub>  | 14                   |
| TREU 667 PC                                                                                                                                                                                                                                                            | TATAATTAAATGCACAGCCGAAGTTAAGGTAGAATAGTGATATATATAT <sub>N</sub>  | 5                    |

\* no gRNAs identified.
