# Supplementary material
Source: publisher figshare collection journal article supplement (https://plos.figshare.com/articles/dataset/_/5481889)
Supplement: Supplementary file [file 1]

### A. ATPase 6 - Pan-edited non-dual coding

GUUAAUAAUA T. brucei  
----- T. vivax

|                                                    |                                     |           |
|----------------------------------------------------|-------------------------------------|-----------|
| GGUUUUAUUGAGGAUUGUUUAAAAUUGAAUA                    | AuuAuAuAuuuuuuuAuGuuuuuGuuuC****    | T. brucei |
| -----                                              | -----                               | T. vivax  |
| *GuuGuAuAuuuGuuGGuGuuA-***                         | GuGGuGuuuuuuGuuuuuuuuAuCuuuACCuGCCA | T. brucei |
| -----                                              | -----                               | T. vivax  |
| uuGuuAuGuGuAuGGuAuuuuGuuuGuuG****                  | GGAuuuAuuuGuuuAuGUUUG**             | T. brucei |
| -----                                              | -----                               | T. vivax  |
| **GuAGuuuuuuAuuuGuuGAuGuG****                      | GuuuuAuuuuuuuuuuuGuuGGuuuuuGuA      | T. brucei |
| -----                                              | -----                               | T. vivax  |
| uuuGuuuGuuGuuGuuAuGuuAGAuuuGuuuGuGAuuuuuu          | ACGuGGuuuAuuuGAu                    | T. brucei |
| -----                                              | -----                               | T. vivax  |
| uuuGuGuuuuAuACGuuGuAuCCAGuAuGuuuuuu                | AuGGuuuuuAuGuAG*UGAGuuu             | T. brucei |
| -----                                              | -----                               | T. vivax  |
| GuuuuAuuuAuGGCGuuuuuuG**                           | UUGuAuAuuuGGuuuAuGuuuAuuuuuGuGuuGuG | T. brucei |
| -----                                              | -----                               | T. vivax  |
| AGuuuGCUUUCGuuuuuuGuuuACCuuAuAuGuuuu               | GuuGuuuAuAuGuGAuAuGGuu              | T. brucei |
| -----                                              | -----                               | T. vivax  |
| uuGuuuuuuAuGG*UAuuuuuuuAGAuuuAuuuAAuuu             | GuuGAuAAuACAuuuuAUUUG               | T. brucei |
| -----                                              | -----                               | T. vivax  |
| uuUGuuAGuGGuuuAuuuGuuAAuuuuuuuGuuuu                | GuGUUUUUGGuuuAGGuuuuuuuGu           | T. brucei |
| -----                                              | -----                               | T. vivax  |
| uG**UUGuuGuuuuGuAuAuGAuuGAGuuuGuuGuuuG****         | G--uuuuuuGuuuuuG-                   | T. brucei |
| -----                                              | uuG-uuG--uuGuuuuuuuuGuuuuuGu        | T. vivax  |
| uGAAACCA--GuuA--UGAGA**GUUUGCAuuGuuAuuuAu          | ACAuAAGuuGuGG***                    | T. brucei |
| uGAA-uCA**GuuG***UGGGA**AuuuACGuuGuuAuuuAu         | ACGuuGAGuuGuGG---                   | T. vivax  |
| *UG--uuuuuGGuuCuAuuuuAuuuuuAuG--GAuuuAu            | UACAuuuuA**UGCAuGuuu                | T. brucei |
| -uG*UUUUUGGuuCuAuuuuAuuuuuAuG***GAuuuGuu           | GCAuuuuA--uGCAuGuuu                 | T. vivax  |
| uuuuAGGuGuuuuGuuGuuG-uuuAuuuG-uuuuAuG--CGuuu       | GuuuAAuuuuuuGuGu                    | T. brucei |
| uuuuAGGuGuuuuAuGuuGuuuuA--uGuuuUUAuG**CGuuu        | GuuuAGuuuuuuAuGu                    | T. vivax  |
| AuGGAuACACGuuuuGuuuuuuuuGuAuGuGuuuGuuuAuAu         | uGACAuuuuGuuGA-UUU                  | T. brucei |
| AuGGAuACACGuuuuGuuuuuuuuGuAuGuuGuuuGuuuGuAu        | uGACAuuuuGuuGAUUU*                  | T. vivax  |
| AGuuuGAuuuuuuuuuAuGCGAuuuGuuuAuuuuGAuGuuuuAuG---   | uGuuAuGuAu                          | T. brucei |
| GGuuuGGuuuuuuuuuGuuGCGAuuuGuuuAuuuuGAuGuuuuAuG**** | UGuuAuGuAu                          | T. vivax  |
| uGuGuGuGuAAuuuuAuGGuGuuuuUUUAGUUGuuGAuuA*          | GuuAAuuuGuAuGGUAG                   | T. brucei |
| uGuGuGuGuAG-----                                   | -----                               | T. vivax  |
| UUUGUAGGAAG--                                      | T. brucei                           |           |
| -----                                              | T. vivax                            |           |

```

AGAAAUAUAAAUAUGUGUAUGAUUAUAAAAACAAGuuuGA***UUGuuuGGuuuG- T. brucei
-----AuGuuuGA--*UUGuuuAGuuuGU T. vivax

--uuG-uuuuUUUAuuGuuuGuuuGuACAuuuuuuuuuGuuuuuuAuuuGuuuGuG---- T. brucei
U***GuuuuuuuuuAuuG-uuGuuuGuACAuuuuuuuuuGuUUUUUGuuuAuuuGuG***** T. vivax

***A**UUUGuuuuuuAuGuuuGuuA-*UUUA-----GuuuuuGuuuuuuAuuGGAuuuu T. brucei
***A--uuuGuuuuuAuGuuuGuuG--uuuGuuuuuuG--uuUA---uuuG-uGGAuuuu T. vivax

uGuuuuuuuAuuuAA----uA--uGGGuuuA--uUGuuGuGuuuAuuuuuuuuuuuuuAuu T. brucei
uGuuuuuuuGuuuAA***UA**UGGGuuuG***UUGuuGUGuuuAuuuuuuuuuuuuuGuu T. vivax

uuAuCAuuuGAuAuGuuGuuAuCAuuuuUAuuAuGuAuAuAAGuUUUCGUUAUUAGAuu T. brucei
uuAuCAuuuGAuAuGuuAuAuCGuUUUUGuuAuAuAuAuAAGuUUUCGUUAUUAA-- T. vivax

AAAAAAGUAUGCAAAUAAUUUUUGU T. brucei
----- T. vivax

```

[illegible]

### E. ND3 - Pan-edited dual coding

UCAAAAAAUCCUCGCCUUUUUACUUUA-GUUUGUUAUCAuuA--uuuuuAuAuuuGuuuu T. brucei  
-----AUG----UUAuCA--AUuuuuuuGuAuuuG---- T. vivax

UG---\*A\*UA-uuGuGGuuuA\*\*UUuuuuuAuuuA-uAGG--uuuuuuuuuAuGuuuuuu T. brucei  
-GUUUuG-uGuuuGuGGuuuA--UuAuuuuA-uuGuuAGGuuuuuuuCU\*\*AuGuuuuuu T. vivax

AuGuuuuuuAuGCAuuuuuuuG----AuGuuuuCGuuGuuGuuuGuGGuuuuCGuGuG T. brucei  
AuGuuuuuuGuuACAuuuuuuuG\*\*\*AuGuuuuCGuuGuuGuuuAuGAuuuuCAuGuG T. vivax

---GuUUGuA---uGAuAuG--A-----AuUCACGuuuG\*GUGuuuuA--uACAuGGAu T. brucei  
\*\*GuuuGuA\*\*UGAuAuG\*\*A\*\*\*\*\*AuUCACGuuuG-GuGuuuuA\*\*UACAuAGAu T. vivax

uuAUGuuuuGuuA-----GuUGuUUGuuuuuuGuAuGuu---AAAuCCAu T. brucei  
uuAuGuuuuGuuA\*\*\*\*\*GuuGuuGUuuuuuGuGuuAUU\*\*\*GAAUuCuGu T. vivax

UAuuuGu----GuUUUGuuGuuuGuuuuuG--UG-----A-uA\*GuGuuGuuuuA T. brucei  
uAuuuGU\*\*\*GuuuuGuuAUUUG----uAuuuGU\*\*\*\*\*GuuG-GuAuGuuuuA T. vivax

uuuuuGuuAU----GGuuuuuuuG-uUUUUGuGGuuuuuuGuuuuuuGuuG-uA-uGuA--- T. brucei  
uuuuuGUUAU\*\*\*GGuuuuuuuA\*UUUUUGuGGuuuuuuGuuuuuuG-uGuuGuuA--\*U T. vivax

uAG\*\*\*GAuuUGuGuGGuAuuuuuGGGA-UCAC\*GuAuAuuuGuGuGGuGUAuuuuuAu T. brucei  
UAG----GGuuuGuGUGGuAuuuuuGAGA\*UCA-uGuAUUU----- T. vivax

uuuGuuuAuGA\*\*UGuuuUUUGUUGUAUUUAUCAUAUUUAUUAAUAUAUAAAA T. brucei  
----- T. vivax

### F. ND7 - Pan-edited dual coding

UGAUACAAAAAACAUAGACUACAUGAUAAAGUAuCAuuuuuAuG-uuAuuuuuG--GuAGuu T. brucei  
-----AuGuuuAuuuuuGuuGuAGuu T. vivax

uuuuuACAuuuGuAuCGuuuuACAuuuG\*GUCCACAGCAuCCCG\*\*\*CAGCACAuG\*\*G- T. brucei  
uuuuuGCAuuuGuAUcGUuuuACAuuuG-GCCACAGCAuCCCG--CAGCACAuG-\*G\* T. vivax

uGuuuuAuGuuGuuuAuGuAuuuuuGuGGuGA\*AuuuAuGuuuA\*\*UA--UUGAuUG T. brucei  
UGuuuuAuGUuGuuuAUUGuAuuuuuGUGGuGA-AuuuAuGuuuA--uA\*\*\*UUGAuUG T. vivax

uAuAuA\*\*\*G\*GuuA--UUUGCAUCGUGGUACAGAAAAGUUAUGUGAAUAUAAAAGUGU T. brucei  
uAuAuA---G-GuuA\*\*UUUGCAUCGAGGUACAGAAAAGUUAUGUGAGUAUAAGAGCGU T. vivax

AGAACAUGUCUCCGuAUUUCGA---CAGGUUAGAuAuGuuA---\*GuGuuuGuuGuA T. brucei  
AGAGCAGUGUCUCCGuAUUUuGAU\*\*\*AGAuAGAuAuGuuA\*\*\*GuGuuuGuuGuA T. vivax

AuGAGCAuuuGuuGuCuuuA\*\*\*UGuuuuGAGuA--uAuGuuGCGAuGuuGuuuGuCGuu T. brucei  
AuGAACAuuuAuGuCuuuA--uGuuuuGAGuA\*\*UAuGuuACGGuGuuGuuuAuCAuu T. vivax

ACGuuGuGCAuuuAuGCGuuuAuAAuGuA\*\*\*GAAuuuAC\*\*\*CCGuAGuuuuAAuG T. brucei  
GCGuGuuGCAuuuAuGCGuuuAuGAuGuA---GAGuuuACU\*\*C\*GUAGuuuuAAuG T. vivax

GuuuGuuGuGuAuAuCAuGuAuGGuuuuGG\*AuuuAGGuuGuuuGuCUCCGuuG\*UUAuG T. brucei  
GuuuAuGuGuGuGuCGuGuAuGAuuuuAG-AuuuAGGuuGuuuAuCCCCGuuA-UuAuG T. vivax

AuCAuuuGAGGAA-\*\*\*CG\*UGA-CAAAuGAuGACAuuuuuuGAuuuAuG\*\*UUGuGGu T. brucei  
GuCAuuuGAGGAG\*\*\*CG-uGAU\*AGGuAAuGACGuuuuuuGAuuuGuG--uuGuGGu T. vivax

uGuCGuAuGCAuuuGGCUUUCAuGGuuuuAuA--\*GGuAUUCUUGAUGAuuuuGuuuuuG T. brucei  
uGuCGuAuGCAuuuGGCUUUCAuGGuuuuAuG\*\*GGuAuCUUGAuGAuuuuGuuuuuG T. vivax

GuuuuGuuGAuuuuuuGuuGuuGuuGA\*\*\*UAAuAuCAuGuuuGuuuGuuAuGGAuuGuu T. brucei

GuuuuGuuGAUUUUuuuGuuGuuAuGA---uAAuAuCGuGuuuGuuuGuuAuGGAuuGuu T. vivax  
 AuGAuuuGuuAuuuG--uGGGuAA--UCGuuuAuuuUAuuuGCGuuuGC\*\*\*GuGGuuu T. brucei  
 AuGAuuuAuGuuuG\*UGGGuAA\*\*\*UCGuuuGuuuuAuuuGCGuuuGC--GuGGuuu T. vivax  
 GuCAuuuuuuGAuuuA--uAuGAuuuA\*\*GuuuuuA\*\*A\*\*UAGuuuAAGuGGuGuuuu T. brucei  
 GuCAuuuuuuGAuuuG\*\*UAuGAuuuG--GuuuuuA--A--uAGuuuGAGuGGuGuuuu T. vivax  
 GuCuCGuuCGuuAGGuAuGGuGuGAGAuUUCGuuuAuuuAGuuGuuA\*\*\*\*UGA\*\*\*\*\* T. brucei  
 GuCACGuuCAuuGGGuAuGGuAuGAGAuGCCGuuuAuAuGuuGuuA--\*\*\*UGA----- T. vivax  
 GuUG-uAuuuuA--uGuuuuGuuAuGAuuAuGuuuuuGuuuuAuA-GGuGAuGCAuuu T. brucei  
 GuuG\*UAUUUUA\*\*\*UGuuuuGuuAuGAuuAuGuuuuuGuuuuAuA\*GGuGAuGCAuuu T. vivax  
 GA\*UCGuuuAuuuuuACGuuuGuuuGAUuGCGuAuGAGuuuGuuGAuuuGuAAGCAA-u T. brucei  
 GAC\*CGuuuGuuuuuGCGuuuGuuuGAuAuGCGuAuGAGuuuGuuGAuuuGuAAGCAA\*U T. vivax  
 GuuuuuuuuGuuGGuuuuuuuGuuuuuG\*\*\*\*\*GuuuuGuuuGuuuGuuuG\*\*AuAuuuA T. brucei  
 GuuuuuuuuGuuGGuuuuuuuGuuuuuG-----GAuuuGuuuGuuuGuuuG--AuAuuuG T. vivax  
 uAuGuGAuAuACCAuuG\*\*\*\*AGACCAuuAuAuGuuAuuuuAuAGuuuG--uGGuGu T. brucei  
 uAuGuGAuGuuACCAuuG---AGACuAuAuAuGuuGuuuuAuAGuuuA\*\*UGGuGu T. vivax  
 uGuuGuuuGCCGGGuAuAU\*-----CAuuuGC\*UUGU-GuuGAACACCCCAAAG-----G T. brucei  
 uGuuGuuuACCAGGuAuAU\*\*\*\*\*CAUUUGC-UUGU\*GuuGAGCAuCCCAAGG\*\*\*\*\*G T. vivax  
 uGA\*\*\*GuAuGuuuGuuAuAU\*\*\*\*GuuuuuGuGuuGGuuuAuGuuCUCGuuuACGuu T. brucei  
 uGA---GuAuGuuuGuuAuAU\*\*\*\*GuuuuuGuGuuGGuuuGuGUUCCCGuuuGCGuu T. vivax  
 uGCGuuGuGCGGAuuuuuuGCA--\*UA--UUUGuuuAuGGAuGuuuGuuuGCGuGGuuu T. brucei  
 uGCGuuGuGCGGAuuuuuuACA\*\*\*UA\*\*UUUGuuuGuuGGAuGuuuGuuuACGuGGuuu T. vivax  
 uuuAuGCAuGAuuuAGuuGC--\*\*\*C\*GuuuuA--GGuAAuAuGAuGuuGuuuuuGGA T. brucei  
 uuuAuGCAuGAuuuAGuuGC\*\*\*\*\*C\*G--uuAuGGuAAuAuGAuGuuGuuuuuGGA T. vivax  
 uCC--GUAGAUCGuuA\*GuuuuAuAuGuG\*\*A\*\*\*\*\*GGUUAUUGuAGGAUUGUUUAAA T. brucei  
 uCU\*\*GuGGAUCGuuA\*G----- T. vivax  
 AUUGAAUAAAAA T. brucei  
 ----- T. vivax

# G. ND8 - Pan-edited non-dual coding

-----CAAUUUAUAUUUUUAAGUUUUGGUUGAUUAuuAuuuuuuuAuuuuuuuAuuu T. brucei  
 ----- T. vivax  
 uuGuAuGuuuuuuuuuGAuuuuuuGuuuuuuuUUUUUGuuuGuuuuuAuAuGuGUuuuGu T. brucei  
 ----AuGuuuuuuuuuGAuuuuuuGuuuuuuuuuuuGuuuGuuuuuAuAuGuGuuuuGu T. vivax  
 uuGuuGuGuuA\*\*\*CuA\*UUUGuuuA\*\*\*CCCAuuGAGuuAACCA--uuGuuAGuuuA T. brucei  
 uuGuuGuGuuA--CC-A-UUuGuuuA\*\*\*CCCAuuGAAuuAAC-AuuuuG-uAGuuuG T. vivax  
 uuGGuuC--GuGGUAA--C-C---AuuuuuuGCGUUUuA\*\*\*UUGGuGuGGuuuAGAG T. brucei  
 uuGA-\*CCCGuGGuAA\*\*\*C\*C\*\*\*AuuuuuuGCGuuuuuA--\*UUGAuGuGGuuuAGAA T. vivax  
 CGuuGuAuGCUuGuCGuuuAuGuGAuuuAAuuuG-C-----CCuA\*\*\*GuuuAGCAuu T. brucei  
 CGUuGuAuGCUuGuCGuuuAuGuGAuuuGAuuuGuC\*\*\*\*\*CC-A----GuuuAGCAuu T. vivax  
 GGAuG\*\*\*UUCGuGuuGGGuGG--AGuuuuGGuGGuCA\*\*UC\*GuuuuGCG--GAuuG- T. brucei  
 AGAuG--uuCGuGuuGGGuGG\*\*\*AGuuuuGGuGGuCA--uC-GuuuuGCA\*\*GAuuG\* T. vivax

-AuuuACAUuGAGuuA-\*UC\*\*GU-\*C----GuuGuAuuuAuGuGGuuuuuGuAuGCA T. brucei  
 \*AuuuACAUuGAGuuA\*\*C-CG\*\*\*AC\*\*\*GuuGuAuuuAuGuGGuuuuuGuAuGCA T. vivax

uGuuuGCCCCGACAGAU\*\*\*G---CC----AuA-----CGCA--UUCAuuGuuuGuuA T. brucei  
 uGuuuGuCCAACAGAu----G\*\*\*CC\*\*\*AuA\*\*\*\*\*CACA\*\*\*UUCAuuGuuuGuuA T. vivax

uGuGuuuuuGuuGuuuA-----GCC\*\*A\*\*UGuAuuuAuG\*GCGC\*\*\*C\*\*\*C---- T. brucei  
 uGuGuuuuuGuuGuuuA\*\*\*\*\*GCC\*\*A--UGuAuuuAuG-GCGC---C---C\*\*\* T. vivax

AAGuuuuuAuGuuuGG---uuGuuGuuuuAuGuuAuuuGAuuuuuAuuuGuGuuuuGuG T. brucei  
 AAGuuuuuGuuAuuuGG\*\*\*UUGuuGuuuuAuGuuGuuuGAuuuuuAuuuGuGuuuuGuG T. vivax

uAGuuAuuuAuuuuGGGuGAuuuAuUGuuuAuGAuuuAA\*\*\*AGAA\*\*AuuCACGGUG T. brucei  
 uAG----- T. vivax

AAAUUAAUUUUGACUAAAU T. brucei  
 ----- T. vivax

#### H. ND9 - Pan-edited dual coding

UUAAUAUCAACUUAUUUUUUUUUAUAACAuuAuAuAuAUGuGuA--uAuUUUUAuGuuuA T. brucei  
 -----AuG-G-GuuuGuuGuuGuGuuuA T. vivax

uuuCGuuuAuGuuuuuGuuuAAuuUUuuuuA\*\*UUGuuuGuGuuGuA-----GA T. brucei  
 uuuCGUuGuGUUUUGuuuGAUuuuGuuuuA--UuGuuuUGuGuuA\*\*\*\*\*GG T. vivax

uGGuGuuUUGuuuGuuuuGuuGA-uuGuAGuuuuuuGuuuuuuuAuGuuuuGuuA-Guu T. brucei  
 UGGuGuuuuGuuuGuuuuGuuGA\*UUGuAGuuuuuuGuuuuuuuAUUGUUuGuuA\*Guu T. vivax

uuuuuuuGuuuuAUUGuAuGuuuuuAuuuuuuAAuuuGuG-AuuuuuGuuuuuAuAuGu T. brucei  
 uuuuuuGuuuuAuGuAuGuuuuuAUUuuuuAAuuuAuG\*GuuuuGuuuuGuAuGu T. vivax

UGuG-AuUUGuuAuGAAuGAuuuuuGuGGuuuuuGuuuuuGuCGuuuuAuGuuGuuGUA T. brucei  
 uGuG\*AuuuAuGuuGAuuGAuuuuuGuGGUuuuuGuuuuuGuCGuuuuAuGuuAuAuA T. vivax

uAuuuuAuuuuGuuuGuuuuuGuGuGuuCGuuuGuGuuuuGuuuuGuGuuGUUGuuuGU T. brucei  
 uAuuuuGuuuuGuuuGUuuuuGuGuuuuCGuuuAuGuuuuGuuuuGuGUUGUuGuuuu T. vivax

AuuuuuGGAuuG---uGuuuuA-\*GuuuuA\*\*GuuGuuuuuGuUAuGC---GuuuuG T. brucei  
 GUUUUuuGGAuuG\*\*\*UGuuuuA\*\*GuuuuA--GuuGuuuuuGuuAuGC\*\*\*GuuuuA T. vivax

uuGuuGGA---ACGC\*GAuGuuuUGAUUUGuuuGGuuuuUAuuuuG--uuGGuAAuGA T. brucei  
 UUGuuAGA\*\*\*ACG-uGAGuGuuuuGAuuuGuuuGGuuuuuAuuuuG\*UUGGuAAuGA T. vivax

uAuuuuACAUCGuuuAuuuGuuG--AuG\*\*\*GuuuuuGuuG-GuuuuuuuuGuuGA T. brucei  
 uGuuuuACACCGuuuAUuuGuuG\*\*AuG---AUUuuuuGuuG\*GuuuuuuuuuGuuGA T. vivax

-AGuGuuAUCCA--uuAuuuGGuuuGuuuGuAuGuuAuuuuGuG--uGuuG\*\*GuG-G T. brucei  
 \*AGuGuuAuCCA\*\*UUAuuuGGUuuGuuuGuAuAuGuuuuGuGuuuuA--GuuA-AuG T. vivax

A--GGA-GAUA-GuAuGuACGuuuACAAuGuuA--uuuuuGuuGuuGCAuACC\*\*AAuuU T. brucei  
 A-\*\*GAUGAuAuGuA---CGuuuACAAuG--GuuuuuuuGuuGuuGCAuACC\*\*AAuuu T. vivax

UUuuuG\*CA----uuAuuuuAuuuA\*\*AuA\*\*UCACCGuUGUAAUUCUAAAUUUCUC T. brucei  
 uuAuuuG-CAUuuuuuuG-uuuA--\*G----- T. vivax

ACUUC T. brucei  
 ----- T. vivax

## I. RPS12 - Pan-edited dual coding

CUAAUACACUUUUUGAUAAACAAACUAAAGUAAAuAuAuuuuGuuuuuuuuGCGuAuGuGA\* T. brucei  
-----AuGuGA\* T. vivax

UUUUUGUAUG\*GuuGuuGuuuAC----\*GuuuuGuuuuAuuuGuuuuAuGuuAuuAuAuG T. brucei  
UUUUUGuAuG-GuuGuuGUUUGC\*\*\*\*\*GuuuuGuuuuGuuuGuuuuAuGuuAuuAuAuG T. vivax

AGuCC----G\*\*CGAuuGCCAGuuCCGGuAACCGACGuGuAuuGuAuGC\*\*C\*\*\*\*GuA T. brucei  
AGUCC\*\*\*\*\*C--CGAuuGCCAGuuCCGGuAAuCGACGuGuGuuGuAuGC--C--\*\*GuG T. vivax

uuuuAuuUAuAuAAuuuuGuuuG-GA-uGuuGCGuuGuuuuuuuuGuuGuuuuAuuG-- T. brucei  
uuuuAuuuGuAuAAuuuuG--uGuGGuuGuuGCGuuGuuuuuuuuGuuG--uG-uGUUU T. vivax

---GuuuA---GuaA--uG\*\*UCAuuAuuuAuuAuAGA---\*\*G---GGUGGuGGuuuu T. brucei  
UuuG---GuuuG-CAUUUG--UCGuuAuuuAuuAuAGA\*\*\*\*\*G\*\*\*\*\*GGuGGuGGuuuu T. vivax

GuuGAuuuACCC---\*\*G\*\*\*\*\*GuG\*UAAAGuAuuAuACA\*CG\*\*UAuuG--uA--AGuu T. brucei  
GuuGAuuuACCC\*\*\*\*\*G---\*\*GuA-UAAAGuAuuAuACA-CG--uA-uGuuuAuuAAuu T. vivax

AGA\*UUUAGAuAUAAAGAUAGUUUUU T. brucei  
AA----- T. vivax
