# Supplementary material
Source: publisher figshare collection journal article supplement (https://plos.figshare.com/articles/dataset/_/5481889)
Supplement: Supplementary file [file 1]

S3 Table: RPS12 5' most gRNA populations and predicted mRNA sequence generated.

[illegible]

| B. RPS12 Form B | Predicted mRNA Sequence                                                                                                                                                                                                                                                                       | Reading Frame |
|-----------------|-----------------------------------------------------------------------------------------------------------------------------------------------------------------------------------------------------------------------------------------------------------------------------------------------|---------------|
|                 | <p style="text-align:center;">M W F L Y G C C L R F V L F V</p> <p>CAAACUAAAGUA<u>A</u>AAAAuuuuGuuuuuuuuGCGuAuGuGA*UUUUUGUAUG*GuuGuuGuuuAC*GuuuuGuuuuAuuuGu<br/>      :  ::  : :  :    :    ::   :  :  :    :       <br/> <u>N</u>UAUUUAGAGUGGAAGAGACGUAUACA<u>U</u>-GAAGACAUGC-CAACAAAUA</p> | ORF           |
| Cell Line       | gRNA Sequence                                                                                                                                                                                                                                                                                 | Reads         |
| EATRO 164 PC    | ATAAACAAACCGTACAGAAGTTACATATGCAGAGAAGGTGAGATTAT <sub>N</sub>                                                                                                                                                                                                                                  | 2218          |
| TREU 927 PC     | ATAAACAAACCATACAGAAGTTACATATGCAGAGAAGGTGAGATTAT <sub>N</sub>                                                                                                                                                                                                                                  | 300           |
| TREU 667 PC     | ATAAACAAACCGTACAGAAGTTACATATGCAGAGAAGGTGAGATTAT <sub>N</sub>                                                                                                                                                                                                                                  | 3834          |

| C. RPS12 Form C | Predicted mRNA Sequence                                                                                                                                                                                                                                                                           | Reading Frame |
|-----------------|---------------------------------------------------------------------------------------------------------------------------------------------------------------------------------------------------------------------------------------------------------------------------------------------------|---------------|
|                 | <p style="text-align: center;">M W F C M V V V Y V L F Y L F</p> <p>CAAACUAAAGUAAAAAG<u>uuuuuuuuuuuu</u>GCGGu<u>Au</u>GuGA*UUUUGUAUG*GuuGuuGuuuAC*GuuuuGuuuuAuuuGu<br/>     :  :  :  :  :  :  :  :  :  :        :         :<br/> <sub>N</sub>UUUUAGAGAGAGAAAAGUGCAUAUACU--AAGACAUAC-CAAUAUAUA</p> | ARF +1        |
| Cell Line       | gRNA Sequence                                                                                                                                                                                                                                                                                     | Reads         |
| EATRO 164 BS    | ATATATAACCATACAGAATCATATACGTGAAAGAGAGAGAT <sub>N</sub>                                                                                                                                                                                                                                            | 144           |

| D. RPS12 Form D | Predicted mRNA Sequence                                                                                                                                                                                                                                                                                                                   | Reading Frame |
|-----------------|-------------------------------------------------------------------------------------------------------------------------------------------------------------------------------------------------------------------------------------------------------------------------------------------------------------------------------------------|---------------|
|                 | <p style="text-align: center;">M L F F F R M W F C M V V V Y V L F Y L F</p> <p>CAAACUAAAGUA<u>uuuAuAuAAUGuuuG</u>uuuuuuuuuuCGu<u>AuGuGA*</u>*UUUUGUAUG*<u>GuuGuuGuuuAC</u>*GuuuuGuuuuAuuuGu<br/>             :     :::  :    :    :    :    :    :    :    :<br/> <u>UGAUUAUAUUAUGUA</u>AAAGAGAGAGAUUAUGCU--AAAACAUAAC-CAACAAGAUUAUA</p> | ARF +1        |
| Cell Line       | gRNA Sequence                                                                                                                                                                                                                                                                                                                             | Reads         |
| TREU 927 PC     | ATATAGAACAACCATACAGAAATCGTATATGCGAGAGAAATGATATTATAT <sub>N</sub>                                                                                                                                                                                                                                                                          | 22            |

| E. RPS12 Form E | Predicted mRNA Sequence                                                                                                                                                                                                                                                                                                            | Reading Frame |
|-----------------|------------------------------------------------------------------------------------------------------------------------------------------------------------------------------------------------------------------------------------------------------------------------------------------------------------------------------------|---------------|
|                 | <p style="text-align: center;">M W F C M V V V Y V L F Y L F</p> <p>CAAACUAAAGUAAuuuAAAuuuuGuuuuuuuuGCGuAuGuGA**UUUUGUAUG*GuuGuuGuuuAC*GuuuuGuuuuAuuuGu<br/>      :::  ::  ::  ::  ::  ::  ::  ::  ::  ::  ::  ::  ::  ::  ::  ::  ::  ::  ::  ::  ::  ::  <br/> <u>N</u>UAAAUUUUAGAGUAGAGAAAGUGCAUAUACU--AAGACAUAUC-CAAUAUAUA</p> | ARF +1        |
| Cell Line       | gRNA Sequence                                                                                                                                                                                                                                                                                                                      | Reads         |
| TREU 667 PC     | ATATATAACCATACAGAATCATATACGTGAAAGAGATGAGATTTTAAAT <sub>N</sub>                                                                                                                                                                                                                                                                     | 2664          |
